# Supplementary material for: Foaming and Structural Studies on the Acidic Subunit of Amaranth 11S Globulin Modified with Antihypertensive Peptides as a Function of pH and Ionic Strength
Source: MDPI journal article supplement (doi:10.3390/molecules27113538), 2022-05-31
Supplement: s1 [file s1]

## Supporting information

**Figure S1.** SDS-PAGE and *Western blot* of recombinant proteins purified.

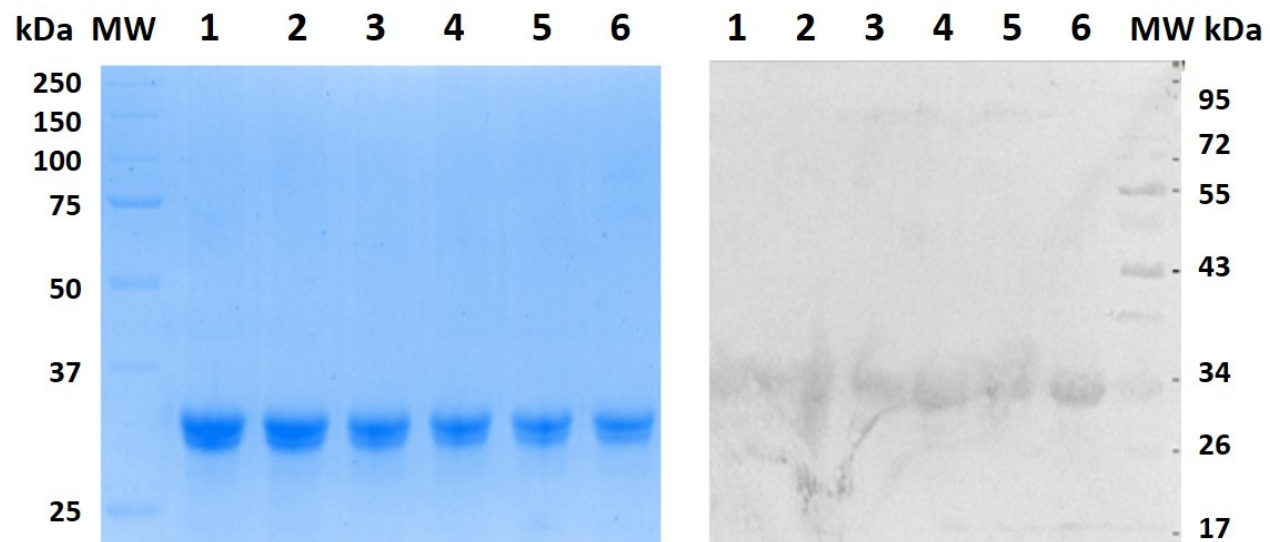

**Lanes:** **MW**, molecular weight marker; **1**, AAC protein; **2**, AACM.1 protein; **3**, AACM.2 protein; **4**, AACM.3 protein; **5**, AACM.3.4 protein; **6**, AACM.4 protein.

**Table S1.** *Percentage estimation of the secondary structure content from the CD spectra of AAC and the modified versions.*

|          |                                          | I=0.05 |      |      |      |      | I=0.5 |      |      |      |      |
|----------|------------------------------------------|--------|------|------|------|------|-------|------|------|------|------|
|          | Secondary structure content <sup>a</sup> | pH 8   | pH 7 | pH 6 | pH 5 | pH 4 | pH 8  | pH 7 | pH 6 | pH 5 | pH 4 |
| AAC      | % helix                                  | 4      | 4    | 3    | 5    | 6    | 5     | 5    | 4    | 5    | 5    |
|          | % sheet                                  | 30     | 29   | 30   | 25   | 28   | 33    | 31   | 29   | 29   | 30   |
|          | % coils                                  | 65     | 66   | 65   | 69   | 66   | 62    | 63   | 67   | 65   | 64   |
| AACM.1   | % helix                                  | 17     | 4    | 6    | 3    | 6    | 7     | 6    | 3    | 4    | 4    |
|          | % sheet                                  | 26     | 31   | 27   | 30   | 29   | 35    | 35   | 31   | 29   | 29   |
|          | % coils                                  | 58     | 65   | 66   | 66   | 65   | 59    | 59   | 65   | 65   | 67   |
| AACM.2   | % helix                                  | 8      | 4    | 6    | 6    | 8    | 5     | 4    | 4    | 4    | 3    |
|          | % sheet                                  | 25     | 30   | 25   | 24   | 22   | 37    | 36   | 31   | 31   | 32   |
|          | % coils                                  | 66     | 66   | 68   | 69   | 69   | 57    | 58   | 65   | 65   | 65   |
| AACM.3   | % helix                                  | 8      | 5    | 4    | 5    | 5    | 4     | 4    | 4    | 4    | 3    |
|          | % sheet                                  | 26     | 32   | 29   | 28   | 29   | 31    | 30   | 29   | 29   | 27   |
|          | % coils                                  | 65     | 63   | 66   | 67   | 66   | 65    | 64   | 67   | 67   | 70   |
| AACM.3.4 | % helix                                  | 8      | 4    | 4    | 3    | 4    | 6     | 4    | 4    | 3    | 3    |
|          | % sheet                                  | 27     | 30   | 29   | 29   | 28   | 30    | 31   | 30   | 29   | 29   |
|          | % coils                                  | 65     | 65   | 67   | 67   | 66   | 64    | 64   | 66   | 68   | 68   |
| AACM.4   | % helix                                  | 10     | 2    | 3    | 3    | 9    | 5     | 4    | 4    | 4    | 4    |
|          | % sheet                                  | 25     | 30   | 33   | 33   | 24   | 35    | 36   | 32   | 30   | 29   |
|          | % coils                                  | 64     | 66   | 61   | 64   | 66   | 60    | 59   | 64   | 65   | 67   |

<sup>a</sup> According to CD spectra deconvoluted by DICHROWEB server using the algorithm CDSSTR.

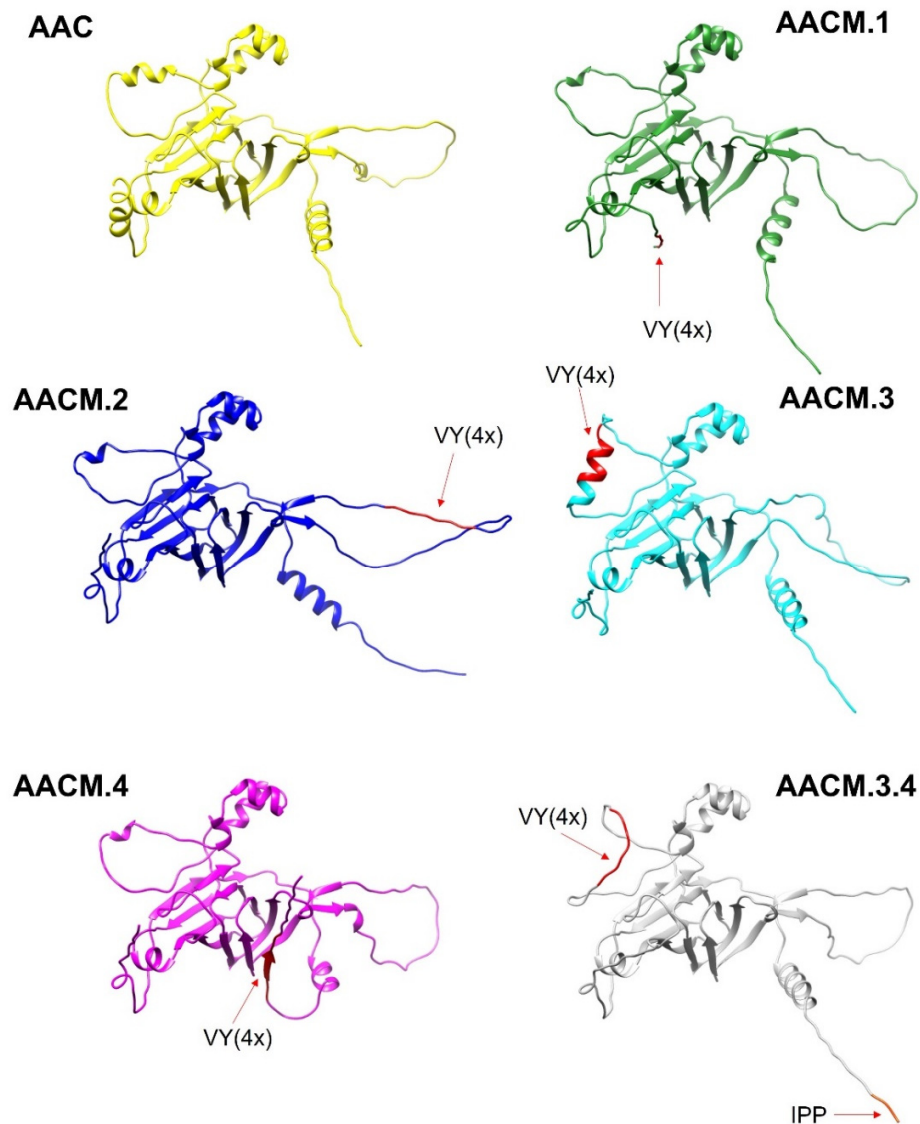

Using AlphaFold Colab (Jumper et al., 2021) was possible to predict models for AAC and their modified versions (Fig. S2). It is evident that peptides inserted in modified versions of AAC promote changes in some regions exposed to the solvent (unordered structure), also promote more closed (AACM.4) or relaxed conformation (AACM.3.4), and changes in helix content (AACM.2 and AACM.3) or beta content (AACM.4), while the core of all protein structures (barrel motif) is preserved (Fig. S3).

**Figure S2.** AAC and their modified versions models predicted using AlphaFold Colab. Arrows indicate peptides inserted in each version [1].

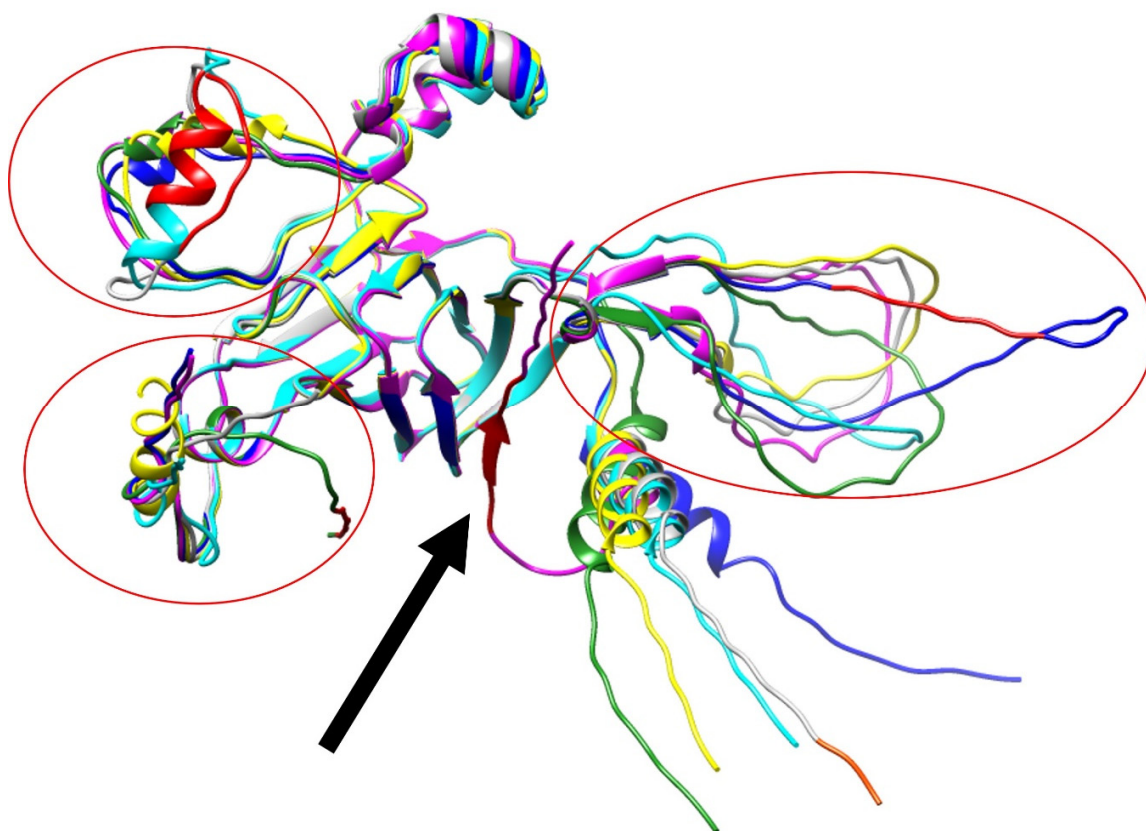

**Figure S3.** Superpose of models obtained using AlphaFold. Ovals indicate the main regions in which were observed the most conformational differences. Black arrow indicate C-terminal region compacted in AACM.4 which increased beta content [2].

## References

1. Jumper, J., Evans, R., Pritzel, A. et al. Highly accurate protein structure prediction with AlphaFold. Nature 596, 583–589 (2021).  
<https://doi.org/10.1038/s41586-021-03819-2>
2. UCSF Chimera--a visualization system for exploratory research and analysis. Pettersen EF, Goddard TD, Huang CC, Couch GS, Greenblatt DM, Meng EC, Ferrin TE. J Comput Chem. 2004 Oct;25(13):1605-12.
